# Supplementary material for: Rebamipide nanocrystal with improved physicomechanical properties and its assessment through bio-mimicking 3D intestinal permeability model
Source: Royal Society of Chemistry journal article supplement (doi:10.1039/d4nr03137g), 2024-01-01
Supplement: d4nr03137g1.pdf [file d4nr03137g1.pdf]

## **Supplementary File**

### **Rebamipide Nanocrystal with Improved Physicomechanical Properties and its assessment through bio-mimicking 3D intestinal permeability model**

Md Samim Sardar<sup>1</sup>, Kardile Punam Kashinath<sup>1</sup>, Mamta Kumari<sup>1</sup>, Sunil Kumar Sah<sup>1</sup>, Kamare Alam<sup>2</sup>,  
Ujjwal Gupta<sup>1</sup>, Velayutham Ravichandiran<sup>3#</sup>, Subhadeep Roy<sup>2\*</sup>, Santanu Kaity<sup>1\*</sup>

<sup>1</sup>*Department of Pharmaceutics, National Institute of Pharmaceutical Education and Research (NIPER), Kolkata, West Bengal 700054, India.*

<sup>2</sup>*Department of Pharmacology and Toxicology, National Institute of Pharmaceutical Education and Research, Kolkata, West Bengal 700054, India.*

<sup>3</sup>*Department of Natural Products, National Institute of Pharmaceutical Education and Research, Kolkata, West Bengal 700054, India.*

#### **#Co-Corresponding Author**

#### **\*Corresponding Authors**

Dr. Santanu Kaity,  
Assistant Professor,  
Department of Pharmaceutics,  
National Institute of Pharmaceutical Education and Research,  
Kolkata, West Bengal, India, 700054.  
Email Id- [skaity13@gmail.com](mailto:skaity13@gmail.com)

Dr. Subhadeep Roy,  
Assistant Professor,  
Department of Pharmacology and Toxicology,  
National Institute of Pharmaceutical Education and Research,  
Kolkata, West Bengal, India, 700054.  
Email id- [subhadeeproy.good@gmail.com](mailto:subhadeeproy.good@gmail.com), [subhadeep@niperkolkata.ac.in](mailto:subhadeep@niperkolkata.ac.in)

**Table S1. Apparent Permeability of Standard drugs: (A) Metoprolol, (B) Acyclovir, (C) Prazosin, (D) Digoxin, (E) Verapamil, (F) Digoxin in presence of verapamil**

| <b>(A) Metoprolol (Dose: 2.99 <math>\mu</math>M)</b>            |                                                  |                                                  |              |           |
|-----------------------------------------------------------------|--------------------------------------------------|--------------------------------------------------|--------------|-----------|
| Time (min)                                                      | Apical to Basal<br>$P_{app} * 10^{-6}$<br>(cm/s) | Basal to Apical<br>$P_{app} * 10^{-6}$<br>(cm/s) | Efflux Ratio | Reference |
| 15                                                              | 5.94                                             | 19.9                                             | 3.350168     | 1         |
| 30                                                              | 4.05                                             | 18.5                                             | 4.567901     |           |
| 60                                                              | 2.15                                             | 12.2                                             | 5.674419     |           |
| 90                                                              | 1.75                                             | 10.6                                             | 6.057143     |           |
| 120                                                             | 1.39                                             | 10.1                                             | 7.266187     |           |
| 150                                                             | 1.27                                             | 8.28                                             | 6.519685     |           |
| 180                                                             | 1.12                                             | 6.93                                             | 6.1875       |           |
| Metoprolol Reported<br>(Dose: 100 mg/250 mL<br>or 9.35 $\mu$ M) | 14.6* $10^{-6}$                                  | 12.7* $10^{-6}$                                  | 0.869863014  |           |
| <b>(B) Acyclovir (Dose: 2.66 <math>\mu</math>M)</b>             |                                                  |                                                  |              |           |
| 15                                                              | 4.69                                             | 10.8                                             | 2.302772     | 2         |
| 30                                                              | 8.55                                             | 12.0                                             | 1.403509     |           |
| 60                                                              | 6.21                                             | 13                                               | 2.093398     |           |
| 90                                                              | 7.15                                             | 12.1                                             | 1.692308     |           |
| 120                                                             | 6.54                                             | 13.5                                             | 2.06422      |           |
| 150                                                             | 6.21                                             | 11.8                                             | 1.900161     |           |
| 180                                                             | 5.79                                             | 10.1                                             | 1.744387     |           |
| Reported Acyclovir<br>(Dose: 2.5 mM)                            | 0.352* $10^{-6}$                                 |                                                  |              |           |
| <b>(c) Prazosin (Dose: 10 <math>\mu</math>M)</b>                |                                                  |                                                  |              |           |
| 15                                                              | 57.7                                             | 1781                                             | 30.86655     | 3         |
| 30                                                              | 68.5                                             | 1303                                             | 19.0219      |           |
| 60                                                              | 64.1                                             | 951                                              | 14.83619     |           |
| 90                                                              | 65.6                                             | 787                                              | 11.99695     |           |
| 120                                                             | 181                                              | 685                                              | 3.78453      |           |
| 150                                                             | 73.1                                             | 683                                              | 9.343365     |           |
| 180                                                             | 77.8                                             | 616                                              | 7.917738     |           |
| Reported Prazosin HCl<br>polyhydrate (Dose: 500<br>$\mu$ M)     | 3.7* $10^{-6}$                                   | 38.2* $10^{-6}$                                  | 10.32432     |           |
| <b>(D) Digoxin (Dose: 10 <math>\mu</math>M)</b>                 |                                                  |                                                  |              |           |

|                                                                     |                                |                                 |          |   |
|---------------------------------------------------------------------|--------------------------------|---------------------------------|----------|---|
| 15                                                                  | 1019                           | 3569                            | 3.502453 | 4 |
| 30                                                                  | 630                            | 2201                            | 3.493651 |   |
| 60                                                                  | 373                            | 1744                            | 4.675603 |   |
| 90                                                                  | 275                            | 453                             | 1.647273 |   |
| 120                                                                 | 240                            | 1159                            | 4.829167 |   |
| 150                                                                 | 195                            | 924                             | 4.738462 |   |
| 180                                                                 | 165                            | 779                             | 4.721212 |   |
| Reported Digoxin<br>(Dose: 1µM)                                     | $1.45 \pm 0.71 \times 10^{-6}$ | $23.27 \pm 2.17 \times 10^{-6}$ | 16.02    |   |
| <b>(E) Verapamil (Dose: 10 µM)</b>                                  |                                |                                 |          |   |
| 15                                                                  | 37.4                           | 98.4                            | 2.631016 | 5 |
| 30                                                                  | 22.8                           | 76.7                            | 3.364035 |   |
| 60                                                                  | 11                             | 37.4                            | 3.4      |   |
| 90                                                                  | 7.97                           | 47.9                            | 6.010038 |   |
| 120                                                                 | 5.36                           | 33.9                            | 6.324627 |   |
| 150                                                                 | 4.28                           | 20.4                            | 4.766355 |   |
| 180                                                                 | 4.45                           | 25.3                            | 5.685393 |   |
| Reported Verapamil<br>(Dose: 75mg/250mL<br>or 70 µM)                | $32.1 \pm 12.4 \times 10^{-6}$ | $28.6 \pm 5.1 \times 10^{-6}$   | 0.9      |   |
| <b>(F) Permeability of Digoxin (10 µM) in presence of Verapamil</b> |                                |                                 |          |   |
| 15                                                                  | 380                            | 1338                            | 3.521053 |   |
| 30                                                                  | 276                            | 1260                            | 4.565217 |   |
| 60                                                                  | 186                            | 905                             | 4.865591 |   |
| 90                                                                  | 122                            | 838                             | 6.868852 |   |
| 120                                                                 | 110                            | 666                             | 6.054545 |   |
| 150                                                                 | 89.4                           | 437                             | 4.888143 |   |
| 180                                                                 | 80.5                           | 383                             | 4.757764 |   |

**Table S2. Apparent Permeability of Rebamipide and its Formulations.**

| <b>(A) REB</b>            |                                                          |                                                          |                         |                  |
|---------------------------|----------------------------------------------------------|----------------------------------------------------------|-------------------------|------------------|
| <b>Time (min)</b>         | <b>Apical to Basal<br/>Papp * 10<sup>-4</sup> (cm/s)</b> | <b>Basal to Apical<br/>Papp * 10<sup>-4</sup> (cm/s)</b> | <b>Efflux<br/>Ratio</b> | <b>Reference</b> |
| 15                        | 58.79                                                    | 21.62                                                    | 0.36775                 | 6                |
| 30                        | 38.01                                                    | 74.5                                                     | 1.960011                |                  |
| 60                        | 27                                                       | 5.27                                                     | 0.195185                |                  |
| 90                        | 22.11                                                    | 3.54                                                     | 0.160109                |                  |
| 120                       | 18.54                                                    | 2.7                                                      | 0.145631                |                  |
| 150                       | 13.87                                                    | 1.75                                                     | 0.126172                |                  |
| 180                       | 13.02                                                    | 1.66                                                     | 0.127496                |                  |
| Reported value<br>(Dose:) | 1.51 ± 0.13 × 10 <sup>-5</sup><br>cm/s                   | 2.50 ± 0.15 × 10 <sup>-5</sup><br>cm/s                   | 1.66 ± 0.11             |                  |
| <b>(B) REB-Man-NC</b>     |                                                          |                                                          |                         |                  |
| 15                        | 6.17                                                     | 60.9                                                     | 9.87034                 |                  |
| 30                        | 18.87                                                    | 75.75                                                    | 4.014308                |                  |
| 60                        | 14.84                                                    | 31.95                                                    | 2.152965                |                  |
| 90                        | 13.82                                                    | 18.12                                                    | 1.311143                |                  |
| 120                       | 17.81                                                    | 27.74                                                    | 1.557552                |                  |
| 150                       | 13.59                                                    | 25.01                                                    | 1.840324                |                  |
| 180                       | 17.12                                                    | 38.04                                                    | 2.221963                |                  |

**Table S3. Chromatographic conditions for different standard drugs**

| <b>Drug</b>                                        | <b>Metoprolol</b>                                                                                        | <b>Acyclovir</b>                                                | <b>Prazosin</b>                                              | <b>Digoxin</b>                                               | <b>Verapamil</b>                                              |
|----------------------------------------------------|----------------------------------------------------------------------------------------------------------|-----------------------------------------------------------------|--------------------------------------------------------------|--------------------------------------------------------------|---------------------------------------------------------------|
| <b>Standard Curve</b>                              | $y=11.56x-3.16$<br>(5-25 $\mu\text{g/mL}$ , $R^2=0.997$ )                                                | $y=21.428x+6.6847$<br>(2-10 $\mu\text{g/mL}$ , $R^2=0.999$ )    | $y=28.237x+7.6647$<br>(2-10 $\mu\text{g/mL}$ , $R^2=0.999$ ) | $y=300.16x+58.213$<br>(2-10 $\mu\text{g/mL}$ , $R^2=0.997$ ) | $y=9.0166x-2.75$<br>(100-500 $\text{ng/mL}$ , $R^2=0.998$ )   |
| <b>Mobile phase</b>                                | A:<br>acetonitrile;<br>B: 10 mM Phosphate buffer (adjusted pH to 3 by 1M phosphoric acid) (A: B = 25:75) | A:<br>orthophosphoric acid (pH 4.2); B: Methanol (A: B = 50:50) | A: Water (0.5%v/v acetic acid); B: Methanol (A: B = 54:46)   | A: water; B: Acetonitrile (A: B = 74:26)                     | A: 10mM sodium acetate buffer; B: Acetonitrile (A: B = 56:44) |
| <b>Flow rate (ml/min)</b>                          | 1.0                                                                                                      | 1.0                                                             | 1.0                                                          | 0.8                                                          | 1.0                                                           |
| <b>Wavelength (nm)</b>                             | 280                                                                                                      | 254                                                             | 250                                                          | 218                                                          | 278                                                           |
| <b>Injection Volume (<math>\mu\text{L}</math>)</b> | 10                                                                                                       | 10                                                              | 5                                                            | 10                                                           | 10                                                            |
| <b>Column Temperature</b>                          | Room Temperature                                                                                         | Room Temperature                                                | 33°C                                                         | Room Temperature                                             | Room Temperature                                              |
| <b>Retention Time (Min)</b>                        | 5.1                                                                                                      | 2.5                                                             | 6.2                                                          | 2.3                                                          | 5.4                                                           |
| <b>Reference</b>                                   | 7                                                                                                        | 8                                                               | 9                                                            | 10                                                           | 11                                                            |

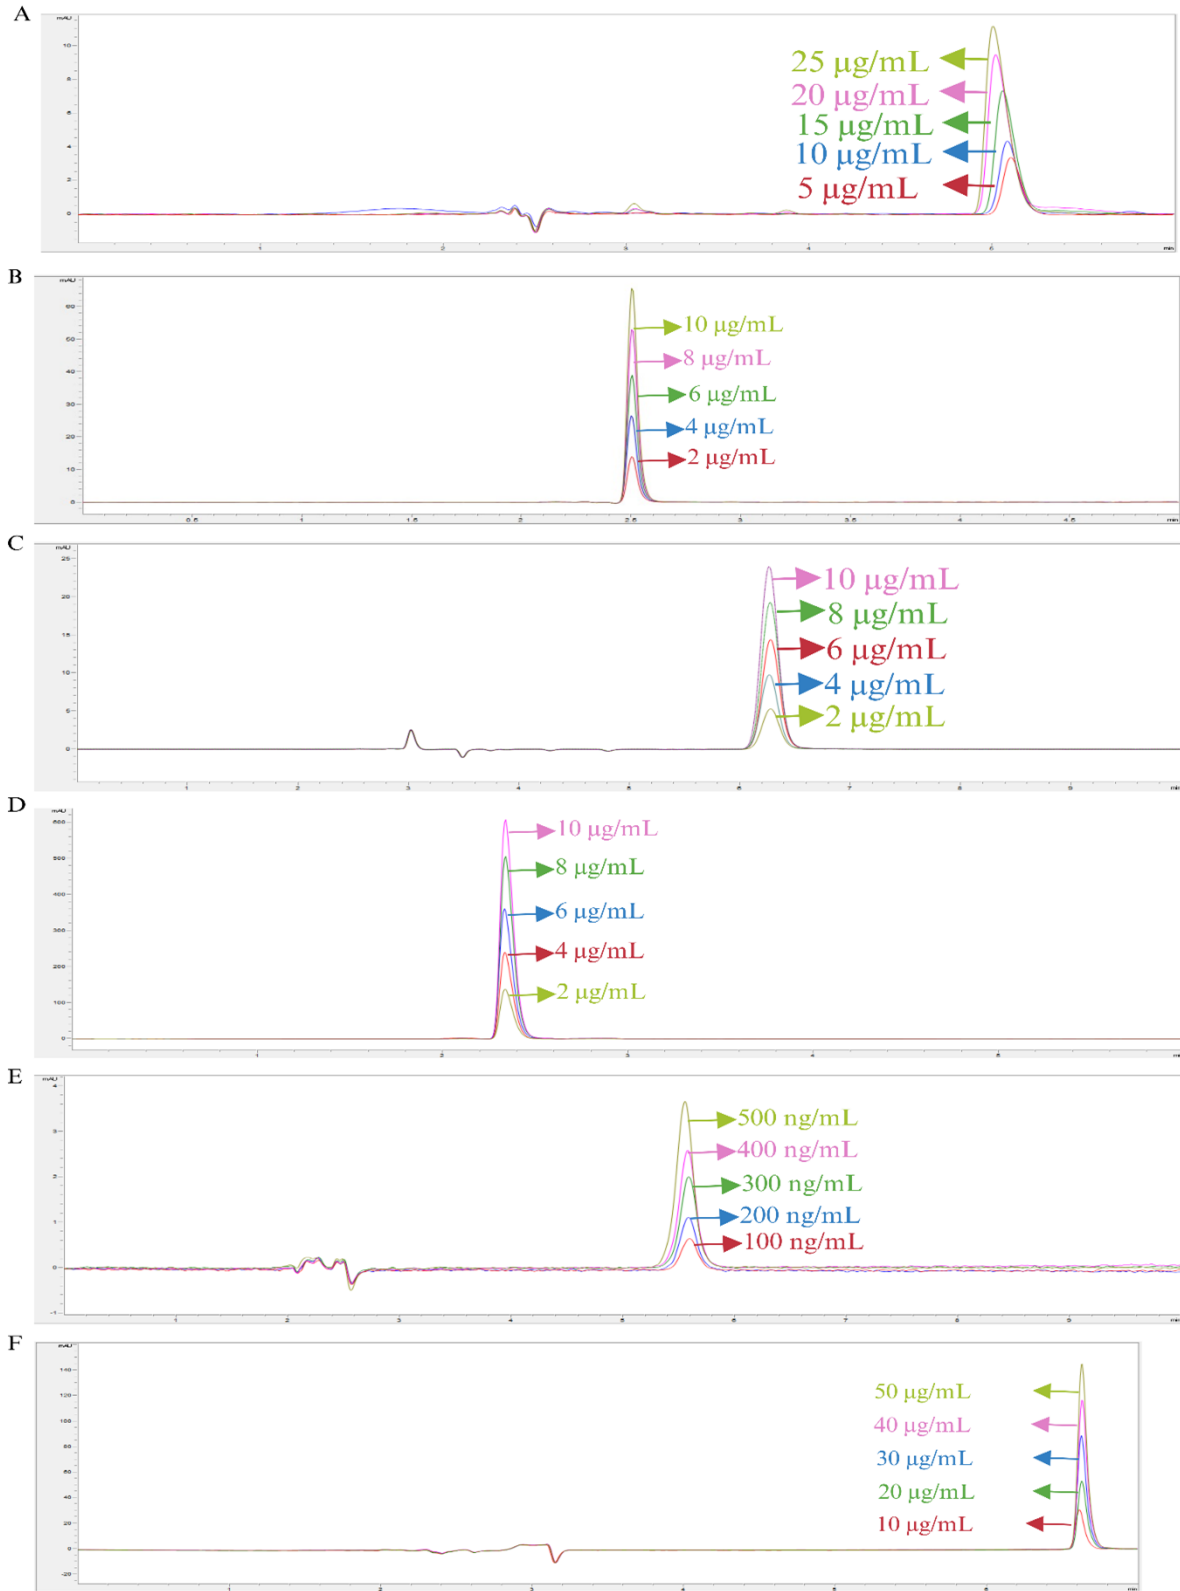

**Fig. S1** Chromatogram of different drugs. (A) Metoprolol, (B) Acyclovir, (C) Prazosin, (D) Digoxin, (E) Verapamil, (F) Rebamipide

## Reference

- 1 T. Jarc, M. Novak, N. Hevir, T. L. Rižner, M. E. Kreft and K. Kristan, *Journal of Pharmacy and Pharmacology*, 2019, **71**, 1231–1242.
- 2 P. Shah, V. Jogani, P. Mishra, A. K. Mishra, T. Bagchi and A. Misra, *Drug Dev Ind Pharm*, 2008, **34**, 279–288.
- 3 L. Kumar, C. L. Meena, Y. B. Pawar, B. Wahlang, K. Tikoo, R. Jain and A. K. Bansal, *AAPS PharmSciTech*, 2013, **14**, 141–150.
- 4 Y. Cai, C. Xu, P. Chen, J. Hu, R. Hu, M. Huang and H. Bi, *J Pharmacol Toxicol Methods*, 2014, **70**, 175–181.
- 5 T. Jarc, M. Novak, N. Hevir, T. L. Rižner, M. E. Kreft and K. Kristan, *Journal of Pharmacy and Pharmacology*, 2019, **71**, 1231–1242.
- 6 M. Miyake and D. Nakai, *Xenobiotica*, 2017, **47**, 821–824.
- 7 N. M. Thakker, V. P. Choudhari, B. S. Kuchekar, H. B. Panchal, D. R. Rakholiya and R. Murugan, *Pharm Methods*, 2012, **3**, 84–89.
- 8 S. Muralidharan, J. Kalaimani, S. Parasuraman and S. A. Dhanaraj, *Advances in Pharmaceutics*, 2014, **2014**, 1–5.
- 9 M. Bakshi, T. Ojha and S. Singh, *J Pharm Biomed Anal*, 2004, **34**, 19–26.
- 10 A. Jedlička, T. Grafnetterová and V. Miller, *J Pharm Biomed Anal*, 2003, **33**, 109–115.
- 11 D. C. Tsilifonis, K. Wilk, R. Reisch and R. E. Daly, *J Liq Chromatogr*, 1985, **8**, 499–511.
